# Supplementary material for: Laterally-extended porphyrin systems incorporating a switchable unitElectronic supplementary information (ESI) available: experimental procedures and characterization of compounds. See http://www.rsc.org/suppdata/cc/b1/b111655j/
Source: Royal Society of Chemistry journal article supplement (doi:10.1039/b111655j), 2002-04-19
Supplement: b111655j.doc [file b111655j.doc]

**Supplementary material**

**B111655J**

**Laterally extended porphyrin systems incorporating a switchable unit**

Maxwell J. Crossley* and Lesley A. Johnston

*School of Chemistry, The University of Sydney, NSW 2006, Australia*

**General Procedures:** Melting points are uncorrected and were recorded on a Riechert hot stage microscope. Microanalyses were performed by the Microanalytical Unit, School of Chemistry, University of New South Wales. Ultraviolet-visible spectra were recorded on an Hitachi 150-20 spectrophotometer. The abbreviation sh is used to indicate a shoulder on a larger absorbance peak. Infra-red spectra were recorded on a Perkin Elmer Model 1600 FT-IR spectrophotometer. Abbreviations used are: w, weak; m, medium; s, strong; for intensity and b, broad.

1H NMR spectra were recorded on a Bruker WM-400 (400 MHz) spectrometer. Tetramethylsilane (TMS) was used as an internal standard. Signals are recorded in terms of chemical shift ( in ppm from TMS), number of protons represented (from integration), multiplicity, coupling constants and assignments, in that order. The following abbreviations for multiplicity are used: s, singlet; d, doublet; t, triplet; ABq, AB quartet; m, multiplet and b, broad. Solvents used were deuterated chloroform (CDCl3) or deuterated dimethylsulfate (*d*6-DMSO).

Electron impact (EI) mass spectra were recorded on an AEI MS902 mass spectrometer. Peaks with a relative intensity of greater than 10% of the base peak are reported. Mass spectra for compounds with molecular weight greater than 1000 amu were recorded by the chemical ionisation (CI) technique on a FINNIGAN MAT TSQ mass spectrometer at the Department of Pharmacy, The University of Sydney; by matrix-assisted laser desorption (MALDI) on a VG instruments MALDI-TOF-SPEC mass spectrometer or on a FINNIGAN LASERMAT mass spectrometer at the Biomedical Mass Spectrometry Unit, University of New South Wales; or by Fast Atom Bombardment (FAB) on a VG instruments VG ZAB-SEQ FAB+ spectrometer at the Australian National University, Canberra.

Pyridine was distilled and stored over 4 Å molecular sieves or potassium hydroxide. Toluene was distilled and stored over sodium wire. Deoxygenation was achieved by bubbling dry nitrogen through the solvent.

Column chromatography was carried out using the flash chromatography technique on Merck silica gel Type 9385.

**2,3,5,6-Tetraamino-1,4-benzoquinone 2**

2,3,5,6-Tetraamino-1,4-benzoquinone **2** was prepared using the method of Wallenfels and Draber1 in a yield of 81%, mp > 320 °C (lit.1 decomposes at 260 °C). max (DMSO)/nm 467 (log  4.26). max (KBr disc)/cm-1 3374m, 3264m, 3173m, 1650m (C=O), 1592m, 1528s, 1378s, 1258w, 816w and 728w. H (*d*6-DMSO) 9.48 (bs, NH2). *m/z* (EI) 28 (67%), 32 (12), 68 (16), 140 (21), 168 (M+, 100).

**2,3,5,6-Tetraamino-1,4-hydroquinone tetrahydrochloride**

2,3,5,6-Tetraamino-1,4-hydroquinone tetrahydrochloride was prepared from 2,3,5,6-tetraamino-1,4-benzoquinone using the method of Wallenfels and Draber1 in a yield of 83%. The recommended method of purification was found to decompose the product, so it was used without purification.

**Quinonoid Bis-Porphyrin 3**

2,3-Dioxo-5,10,15,20-tetrakis(3,5-di-*tert*-butylphenyl)chlorin **1** (62 mg, 0.057 mmol) and 2,3,5,6-tetraamino-1,4-benzoquinone **2** (6 mg, 0.03 mmol) were stirred at reflux in dry, deoxygenated pyridine (2 ml) under nitrogen for 4 h. The reaction was worked up by the usual procedure and *quinonoid bis-porphyrin* **3** (52 mg, 80%) was isolated by column chromatography, with dichloromethane-light petroleum (1:3 then 2:5) as the eluent, to give the product as a dark brown solid, mp > 320 °C. (Found: C, 82.92; H, 8.30; N, 7.12. C158H184N12O2 requires C, 83.12; H, 8.12; N, 7.36%). max (CHCl3)/nm 315 (log  4.57), 418 (5.40), 472 sh (5.11), 547 (4.61), 621 (4.29) and 675 (3.91). max (CH2Cl2-MeOH, 9:1)/nm 414 (log  5.40), 467 sh (5.18), 547 (4.64), 621 (4.26) and 675 (3.94). max (CHCl3)/cm-1 3352w (inner NH), 2966s, 2906w, 2870w, 1701m (C=O), 1593m, 1477m, 1364m and 1164s. H (CDCl3) -2.44 (4 H, s, inner NH), 1.56 (72 H, s, *t*-butyl H), 1.64 (72 H, s, *t*-butyl H), 7.82 (4 H, t, *J* = 1.8 Hz, Ar-Hp), 7.98 (4 H, t, *J* = 1.2 Hz, Ar-Hp), 8.04 (8 H, d, *J* = 1.2 Hz, Ar-Ho), 8.09 (8 H, d, *J* = 1.8 Hz, Ar-Ho), 8.79 (4 H, s, -pyrrolic H-12, H-13, H-12' and H-13'), 8.98 and 9.02 (8 H, ABq, *J* = 4.8 Hz, -pyrrolic H). *m/z* (FAB) 1026 (13%), 1065 (22), 1082 (100), 1110 (36), 1152 (13) and 2283 (M+, 12).

**Hydroquinonoid Bis-Porphyrin 4**

**Method 1**: Quinonoid bis-porphyrin **3** (3.0 mg, 1.31 mol) was dissolved in freshly distilled dichloromethane-methanol (9:1, 10 ml) under nitrogen. The solution was then transferred by cannula to a flask containing sodium borohydride (4 mg, 0.11 mmol) under nitrogen and the mixture allowed to stand for 30 min. The solution was evaporated to dryness and the product redissolved in chloroform and filtered to remove boron salts. Evaporation of the solvent afforded hydroquinonoid bis-porphyrin **4** (in quantitative yield). max (CH2Cl2-MeOH, 9:1)/nm 436 (log  5.89), 525 (4.59), 562 (4.15), 595 (4.23) and 652 (3.68). H (CDCl3) -2.63 (4 H, s, inner NH), 1.52 (72 H, s, *t*-butyl H), 1.53 (72 H, s, *t*-butyl H), 7.80 (4 H, t, *J* = 1.7 Hz, Ar-Hp), 7.92 (4 H, t, *J* = 1.7 Hz, Ar-Hp), 8.07 (16 H, overlapping m, Ar-Ho), 8.79 (4 H, s, -pyrrolic H-12, H-13, H-12' and H-13'), 8.90 and 8.98 (8 H, ABq, *J* = 5.2 Hz, -pyrrolic H-7, H-8, H-17, H-18, H-7', H-8', H-17', H-18'), 9.41 (2 H, s, exchangeable OH). *m/z* (MALDI-TOF) 2285 (M+, 100%).

**Method 2:** 2,3-Dioxo-5,10,15,20-tetrakis(3,5-di-*tert*-butylphenyl)chlorin **1** (48 mg, 0.044 mmol) and 2,3,5,6-tetraamino-1,4-hydroquinone tetrahydrochloride (11 mg, 0.035 mmol) were stirred at reflux in dry, deoxygenated pyridine (2 ml) under nitrogen for 4.75 h. The reaction was worked up by the usual procedure, and the residue chromatographed with dichloromethane/light petroleum (1:4 then 1:3) as the eluent to give two products. The first rapidly decomposed to quinonoid bis-porphyrin **3** in air and assigned the structure of hydroquinonoid bis-porphyrin **4** (3 mg, 6%).

The second product obtained was quinonoid bis-porphyrin **3** (13 mg, 25%), co-chromatographed with and was identical by 1H NMR spectroscopy to an authentic sample.

**1,10-Phenanthroline-5,6-quinone 8**

1,10-Phenanthroline-5,6-quinone **8** was prepared using the method of Thomas *et al.*2 in an overall yield of 25%. The product sublimed at 245–247 °C (lit.2 256-257 °C). max (KBr disc)/cm-1 3060w, 1704w (C=N), 1648s (C=O), 1575m, 1559m, 1456m, 1413s, 1314m, 1291s, 1204m, 1114m, 1009w, 924w, 807w, 737m and 607w. H (CDCl3) 7.61 (2 H, dd, *J*3'',2'' = *J*8'',9'' = 8.1, *J*3'',4'' = *J*8'',7'' = 5.2 Hz, H-3 and H-8), 8.52 (2 H, dd, *J*2'',3'' = *J*9'',8'' = 8.1 , *J*2'',4'' = *J*9'',7'' = 1.7 Hz, H-2 and H-9) and 9.14 (2 H, dd, *J*4'',3'' = *J*7'',8'' = 5.2, *J*4'',2'' = *J*7'',9'' = 1.7 Hz, H-4 and H-7).

**Porphyrin-quinone-phenanthroline 9**

2,3-Dioxo-5,10,15,20-tetrakis(3,5-di-*tert*-butylphenyl)chlorin **1** (102 mg, 0.094 mmol) and 2,3,5,6-tetraamino-1,4-benzoquinone **2** (16 mg, 0.094 mmol) were stirred at reflux in dry, deoxygenated pyridine (10 ml) under nitrogen in the dark for 4 h. The reaction mixture was then transferred by cannula to another flask containing 1,10-phenanthroline-5,6-quinone **8** (40 mg, 0.19 mmol) under nitrogen and then stirred at reflux under nitrogen in the dark for a further 1 h. The stirred solution was allowed to cool overnight and worked up by the usual procedure. The product was purified by column chromatography using dichloromethane as the eluent to remove the front-running impurities followed by dichloromethane/methanol (19:1) to collect the product. The desired *porphyrin-quinone-phenanthroline* **9** (116 mg, 91%) was obtained as a dark brown-black solid, mp > 320 °C. (Found: C: 78.62; H, 6.87; N, 9.29. C94H98N10O2 + 0.5 MeOH requires C, 78.72; H, 6.89; N, 9.71%). max (CHCl3)/nm 246 (log  4.61), 287 (4.42), 329 (4.53), 415 (5.26), 490 sh (4.49), 551 sh (4.23), 628 (3.91) and 682 sh (3.66). max (CHCl3)/cm-1 3504w, 3346w (inner NH), 2966s, 2868m, 1750w (C=N), 1704m (C=O), 1624w, 1592m, 1477w, 1365m, 1294w, 1161s, 1087w, 1000w, 922w and 716w. H (CDCl3) -2.39 (2 H, s, inner NH); 1.57 (36 H, s, *t*-butyl H), 1.58 (36 H, s, *t*-butyl H), 7.85 and 8.08 (4 H, 2 x t, *J* = 1.7 Hz, Ar-Hp), 7.98 (2 H, dd, *J*3'',4'' = *J*8'',7'' = 8.1, *J*3'',2'' = *J*8'',9'' = 4.4 Hz, H-3'' and H-8''), 8.07 and 8.12 (8 H, 2 x d, *J* = 1.7 Hz, Ar-Ho), 8.83 (2 H, s, -pyrrolic H-12 and H-13), 9.04 and 9.14 (4 H, ABq, *J* = 5.1 Hz, -pyrrolic H-7, H-8, H-17 and H-18), 9.43 (2 H, dd, *J*2'',3'' = *J*9'',8'' = 4.4 , *J*2'',4'' = *J*9'',7'' = 1.8 Hz, H-2'' and H-9'') and 9.93 (2 H, dd, *J*4'',3'' = *J*7'',8'' = 8.1, *J*4'',2'' = *J*7'',9'' = 1.8 Hz, H-4'' and H-7''). *m/z* (EI) 1081 (13%), 1386 (44) and 1400 (M+, 100).

**References**

1. K. Wallenfels and W. Draber, *Liebigs Ann. Chem.*, **1963**, 55.

2. N. C. Thomas, K. Pringle, G. B. Deacon, *J. Chem. Educ.*, **1989**, *66*, 516.
